# Supplementary material for: Synthesis and characterization of poly-3-((2,5-hydroquinone)vinyl)-1H-pyrrole: investigation on backbone/pendant interactions in a conducting redox polymer
Source: Royal Society of Chemistry journal article supplement (doi:10.1039/c6cp08736a), 2017-01-01
Supplement: c6cp08736a2.pdf [file c6cp08736a2.pdf]

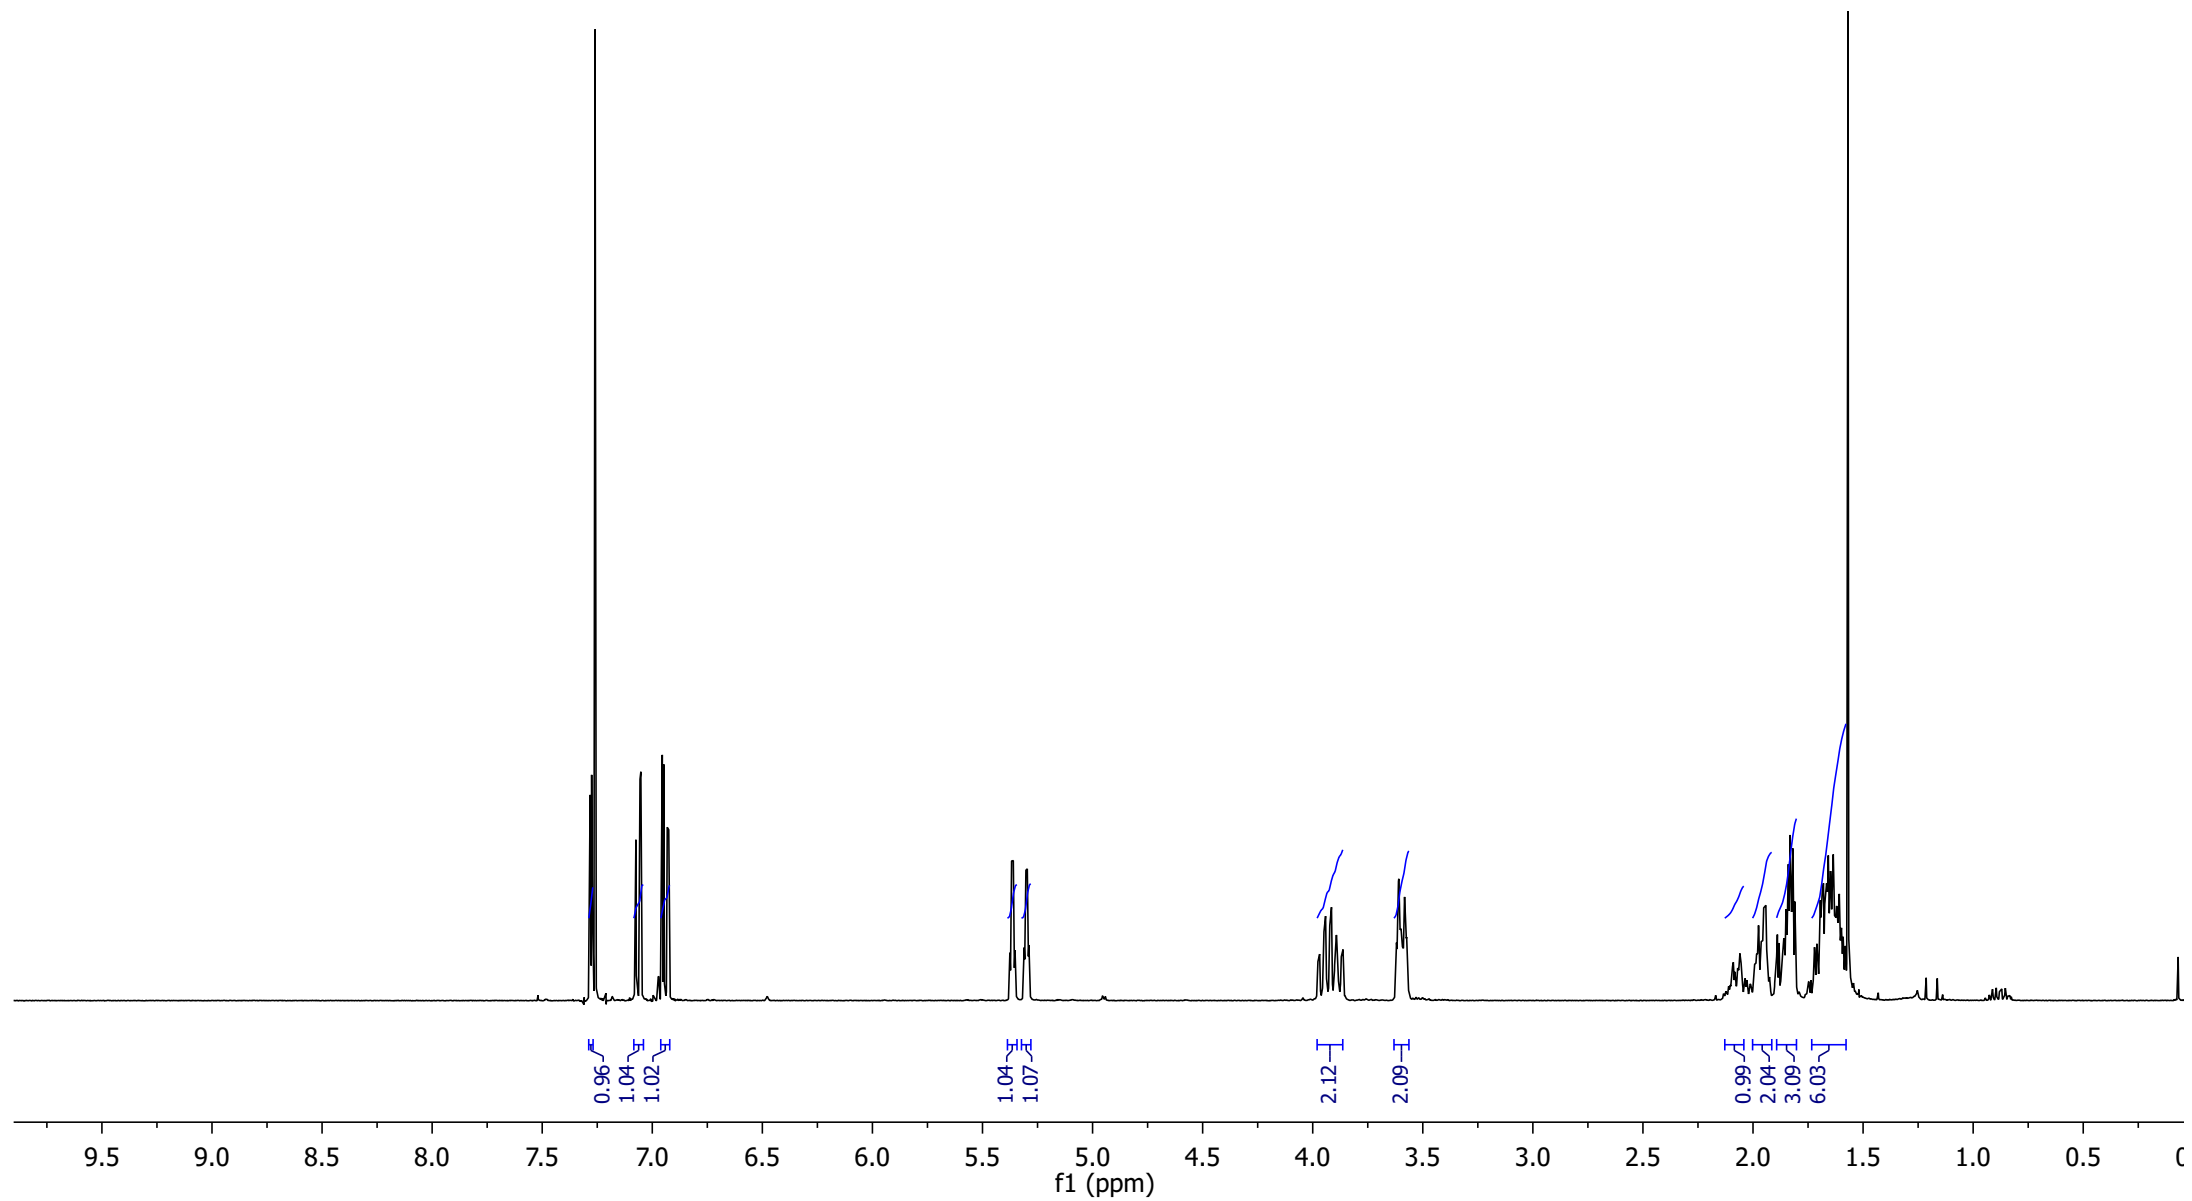

Figure S12. <sup>1</sup>H NMR spectrum (400 MHz, CDCl<sub>3</sub>) of compound 3.

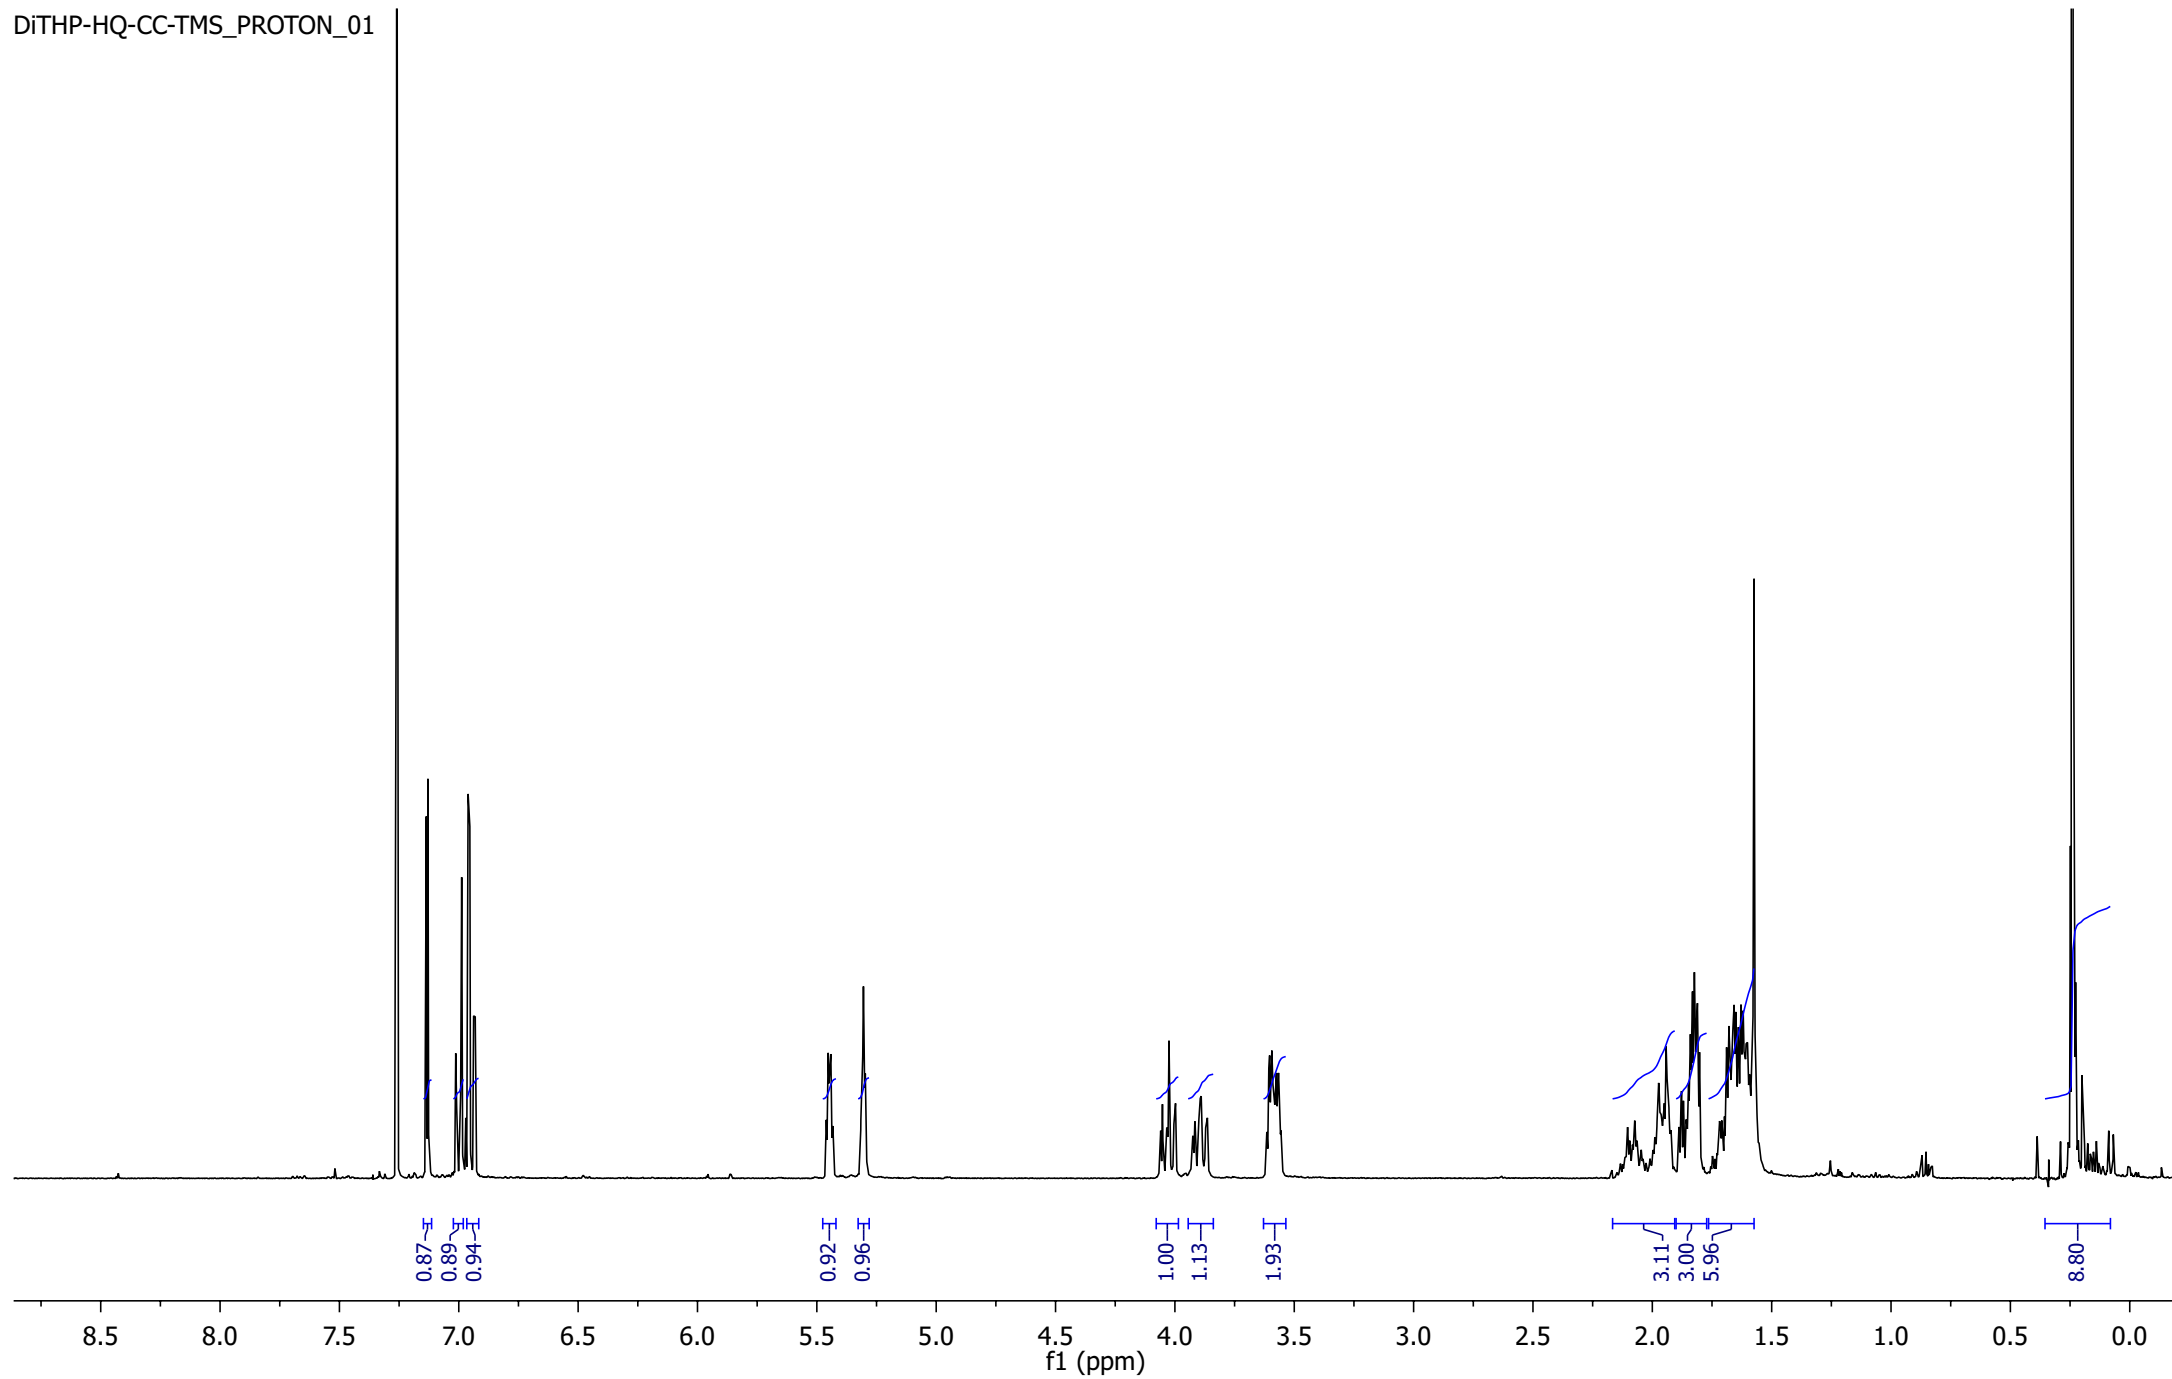Figure S13. <sup>1</sup>H NMR spectrum (400 MHz, CDCl<sub>3</sub>) of compound 4.

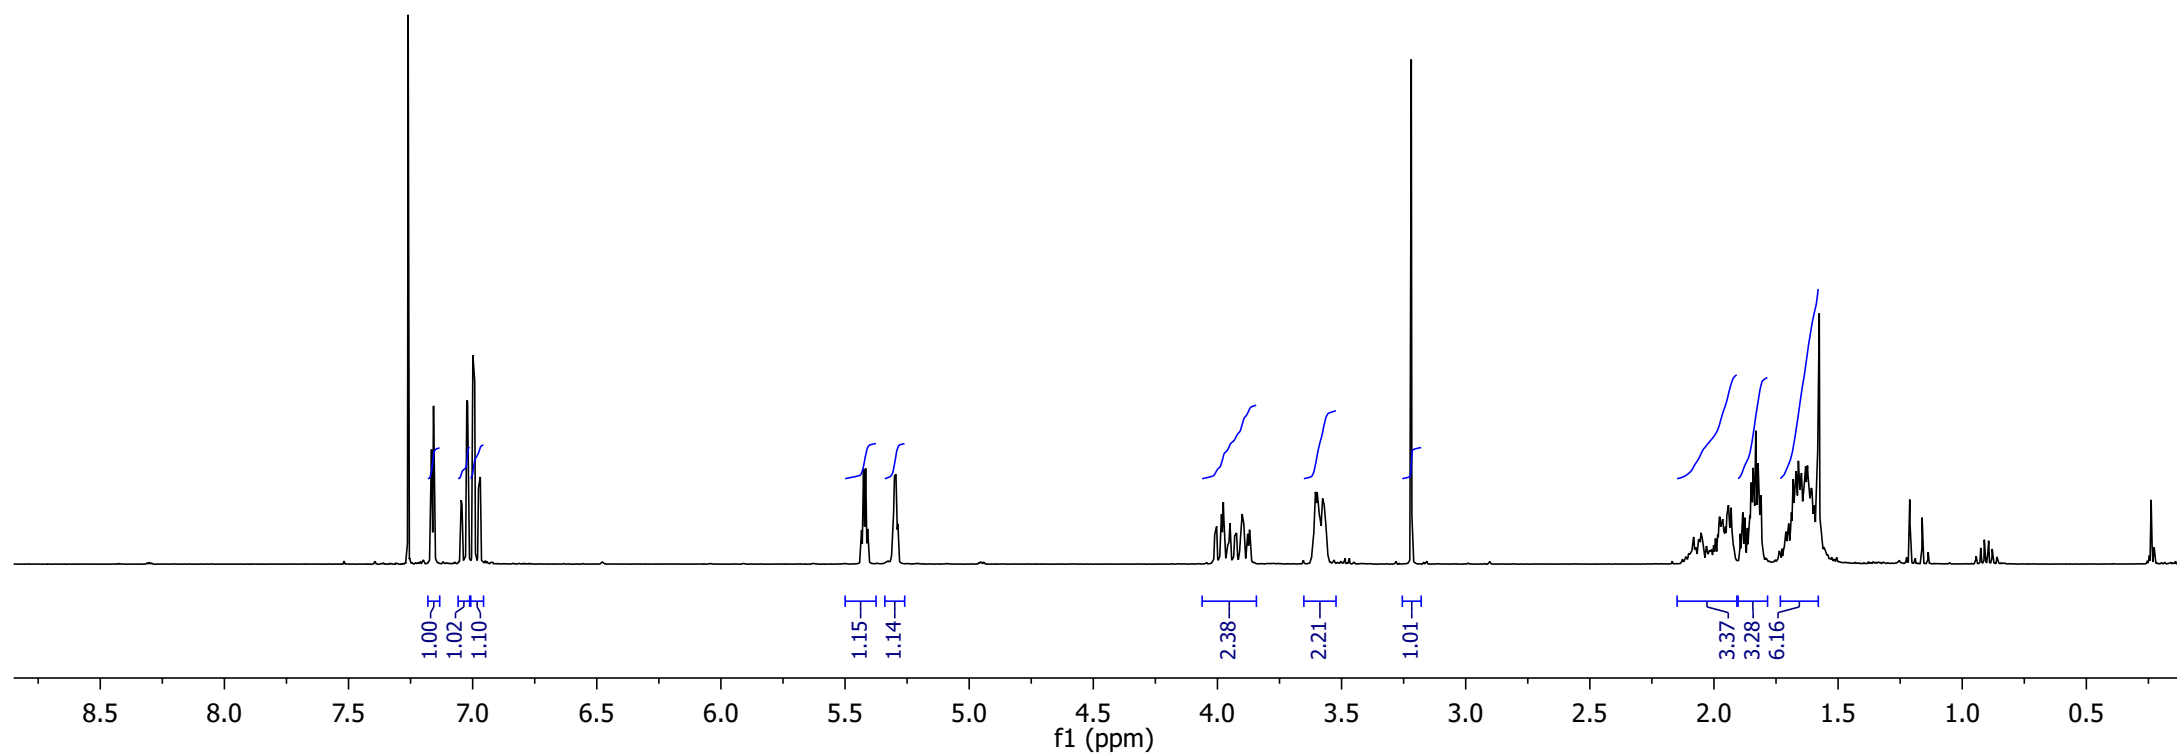Figure S14.  $^1\text{H}$  NMR spectrum (400 MHz,  $\text{CDCl}_3$ ) of compound 5.

7.20  
7.19  
7.19  
7.19  
7.18  
7.18  
6.84  
6.84  
6.64  
6.64

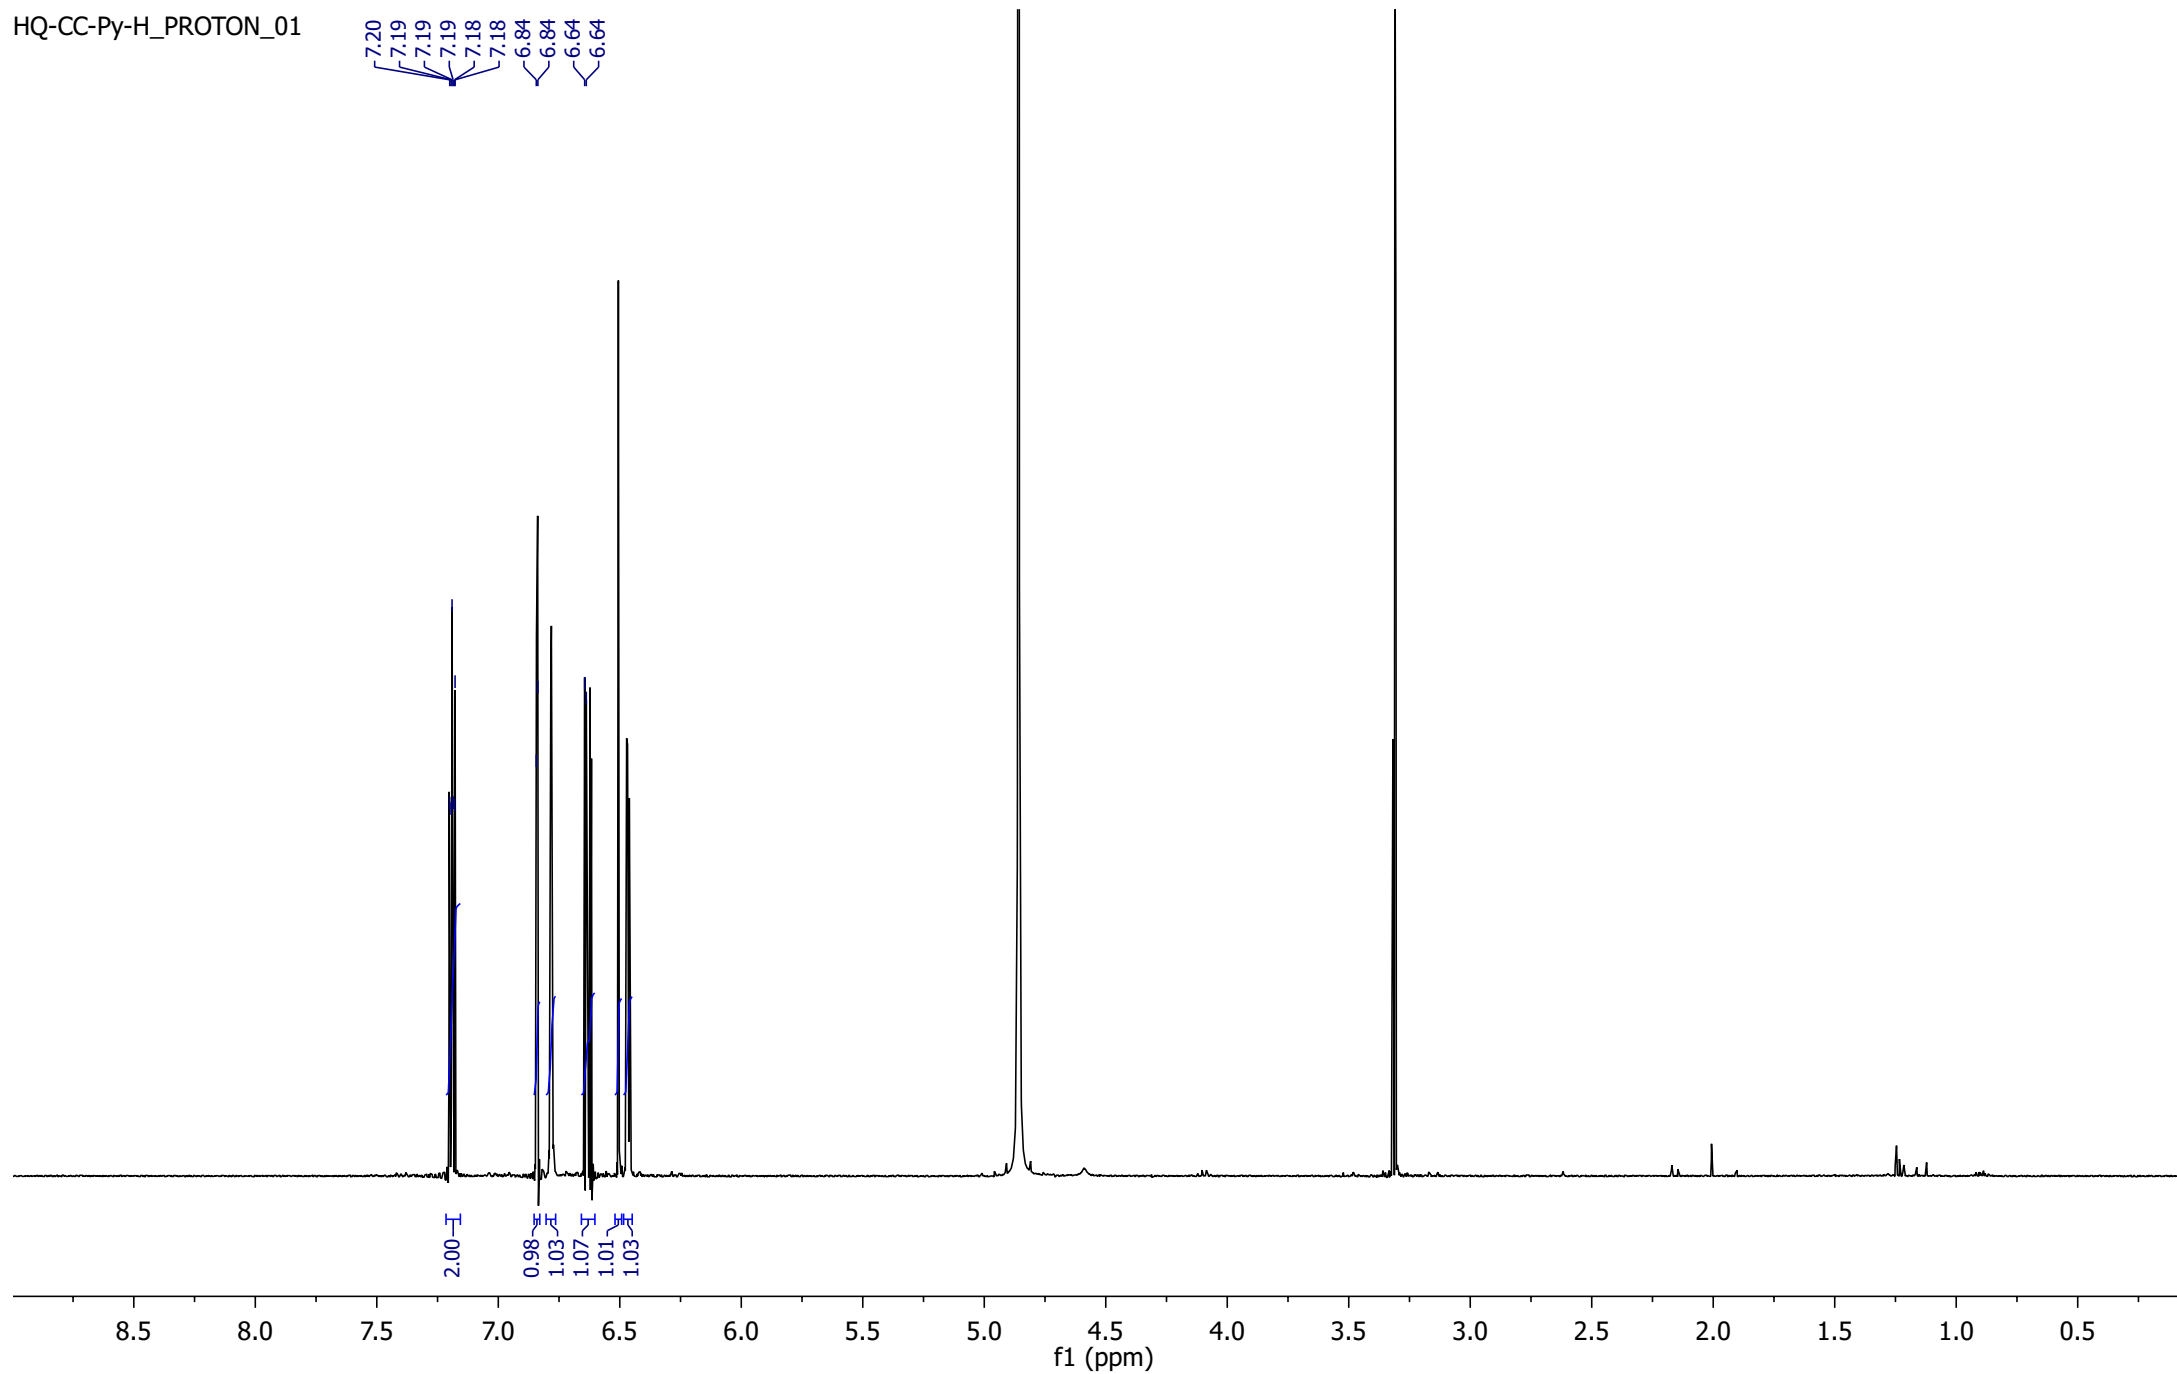

Figure S15. <sup>1</sup>H NMR spectrum (400 MHz, CD<sub>3</sub>OD) of compound 1.

DiTHP-HQ-Br\_CARBON\_01

152.22  
152.18  
148.37  
148.32

121.53  
121.46  
117.87  
117.83  
116.55  
116.44  
113.49

97.60  
97.54  
97.16  
97.10

77.32  
77.20  
77.00  
76.68

61.98  
61.85

30.32  
30.25  
30.24  
25.26  
25.16

18.68  
18.43

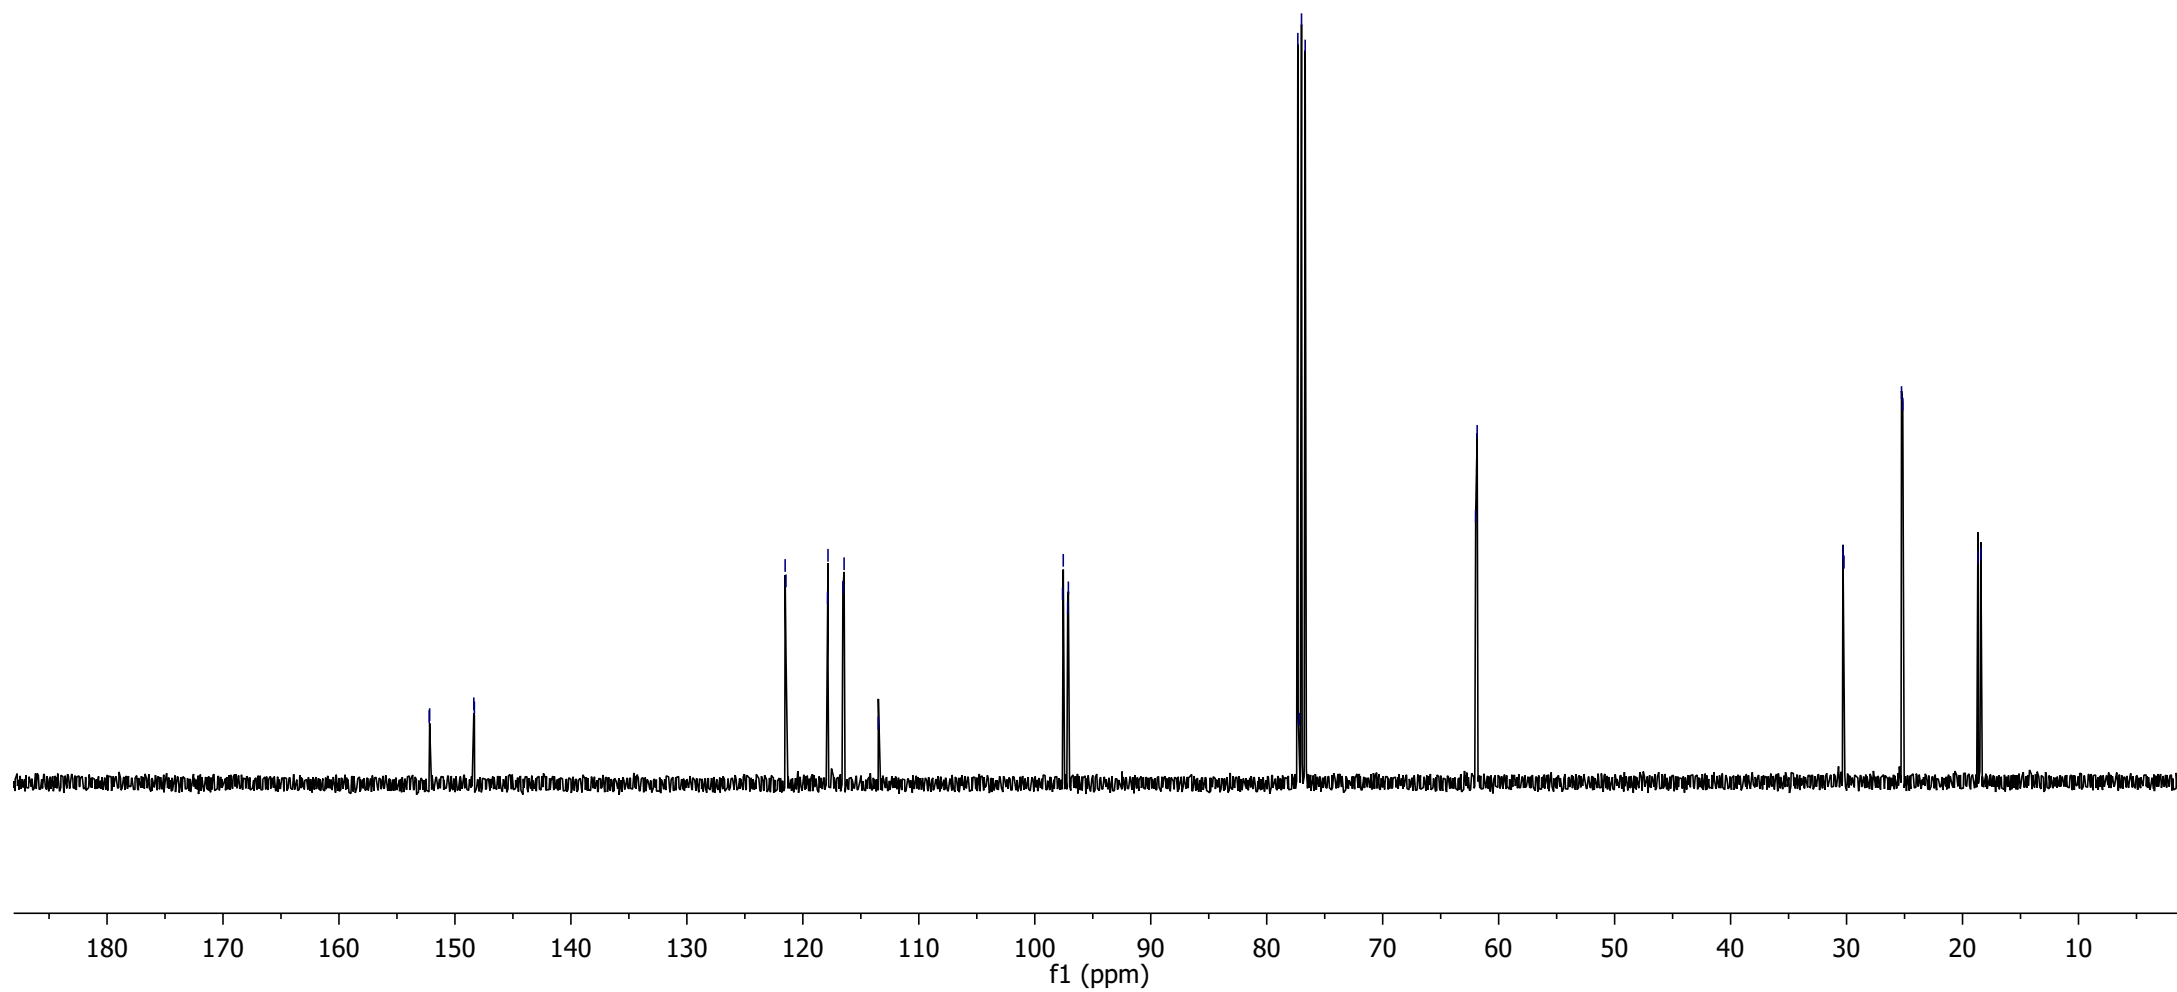

Figure S16.  $^{13}\text{C}$  NMR spectrum (100 MHz,  $\text{CDCl}_3$ ) of compound 3.

DiTHP-HQ-CC-TMS\_CARBON\_01

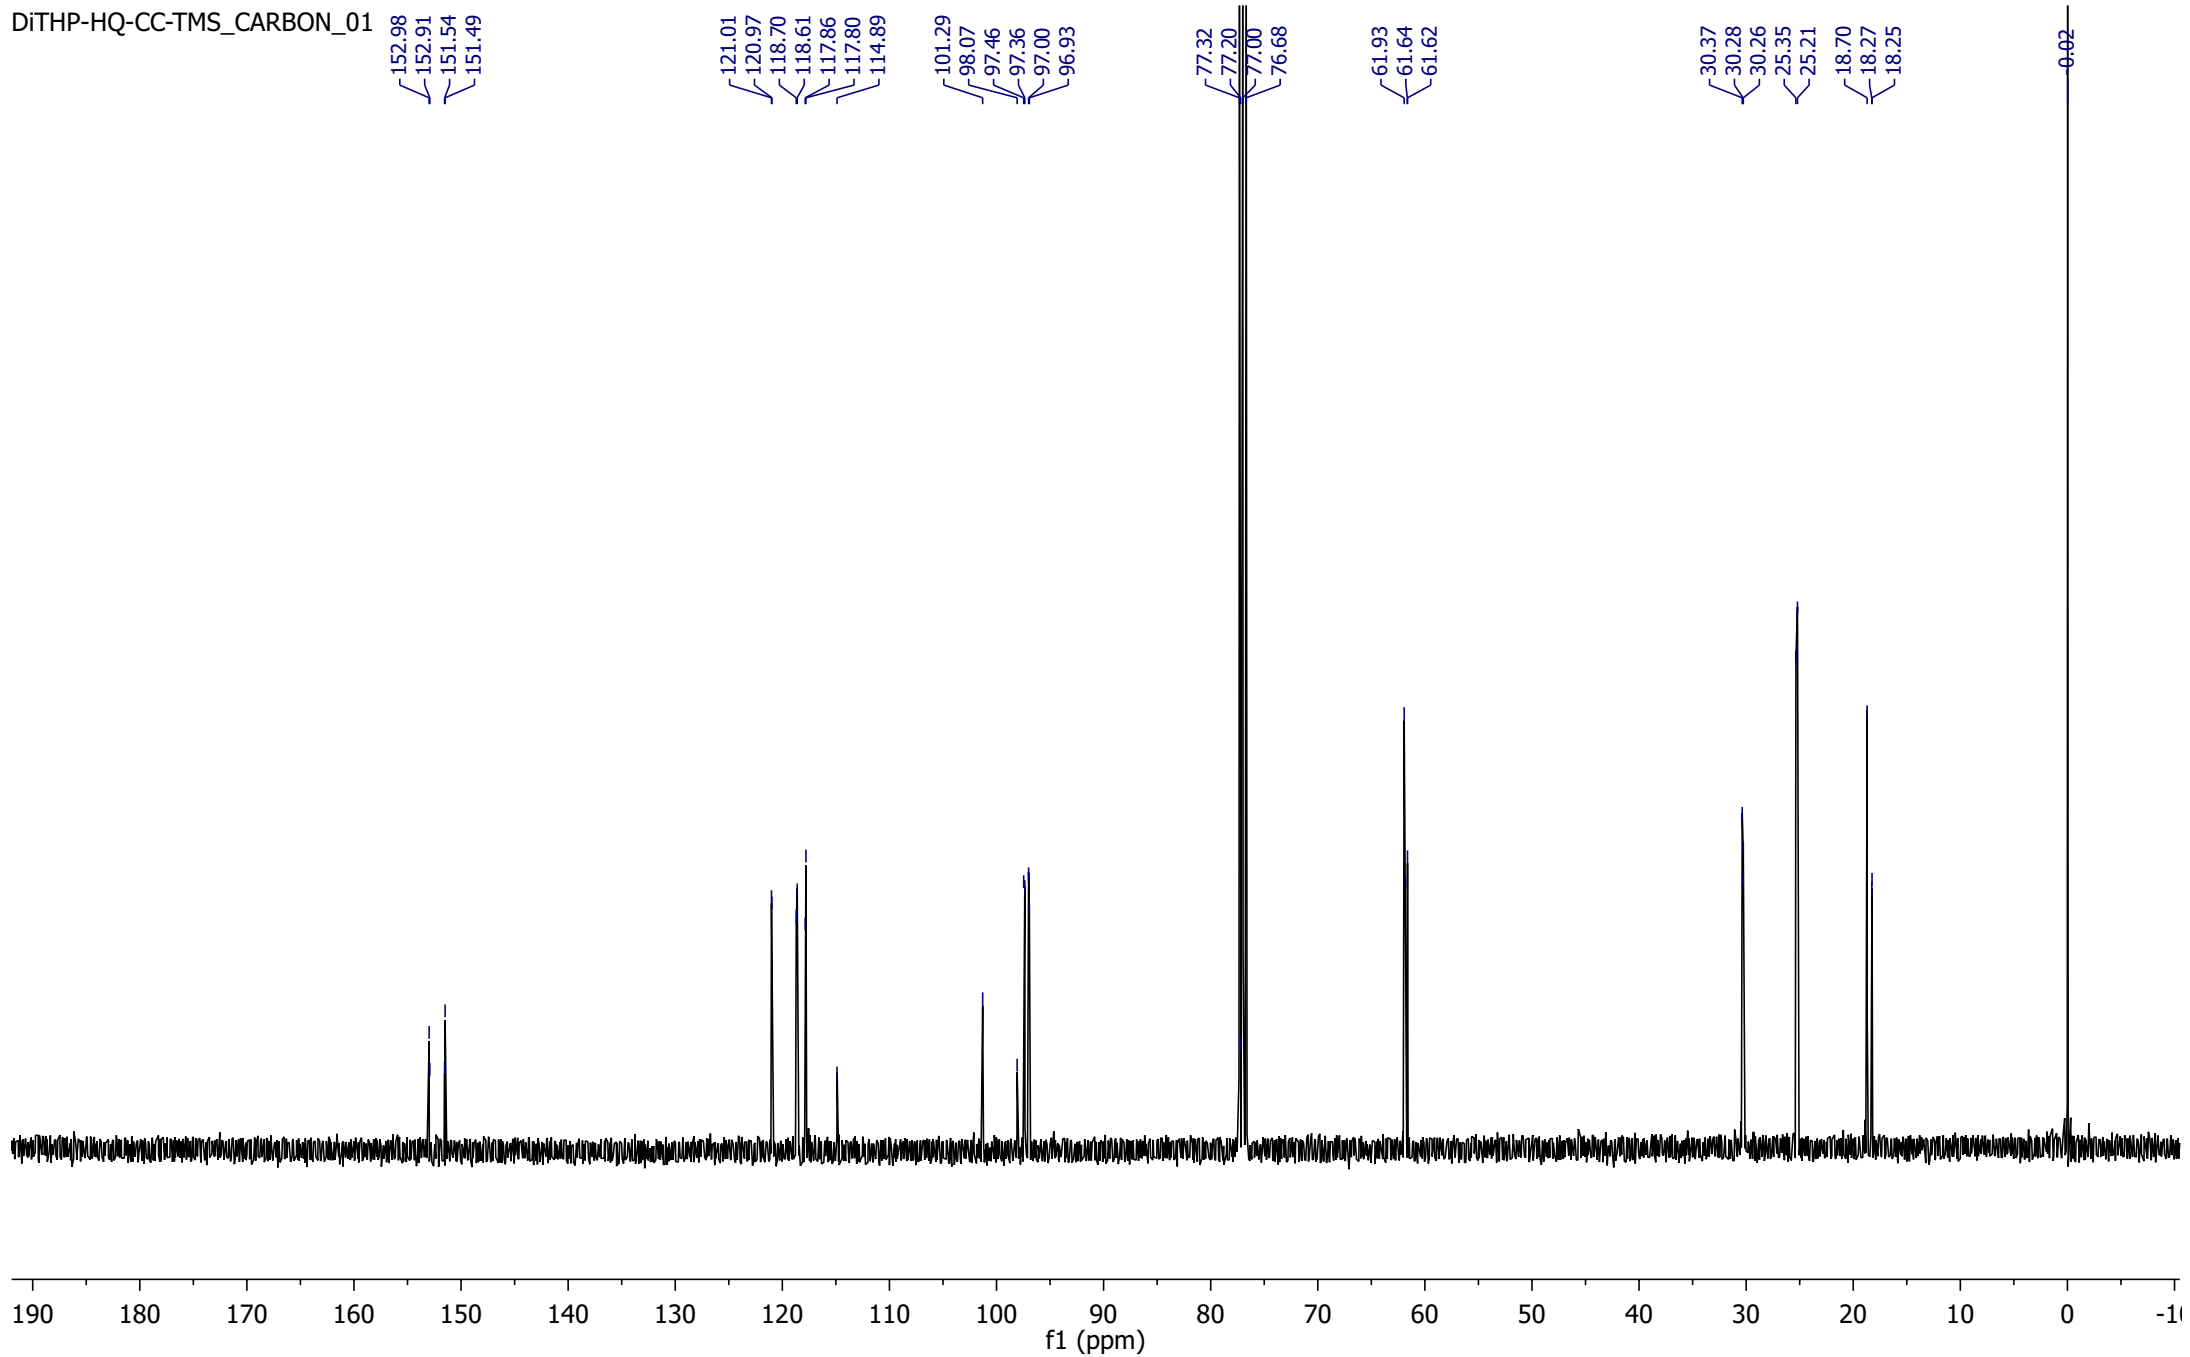

Figure S17.  $^{13}\text{C}$  NMR spectrum (100 MHz,  $\text{CDCl}_3$ ) of compound 4.

DiTHP-HQ-CC-H\_CARBON\_01

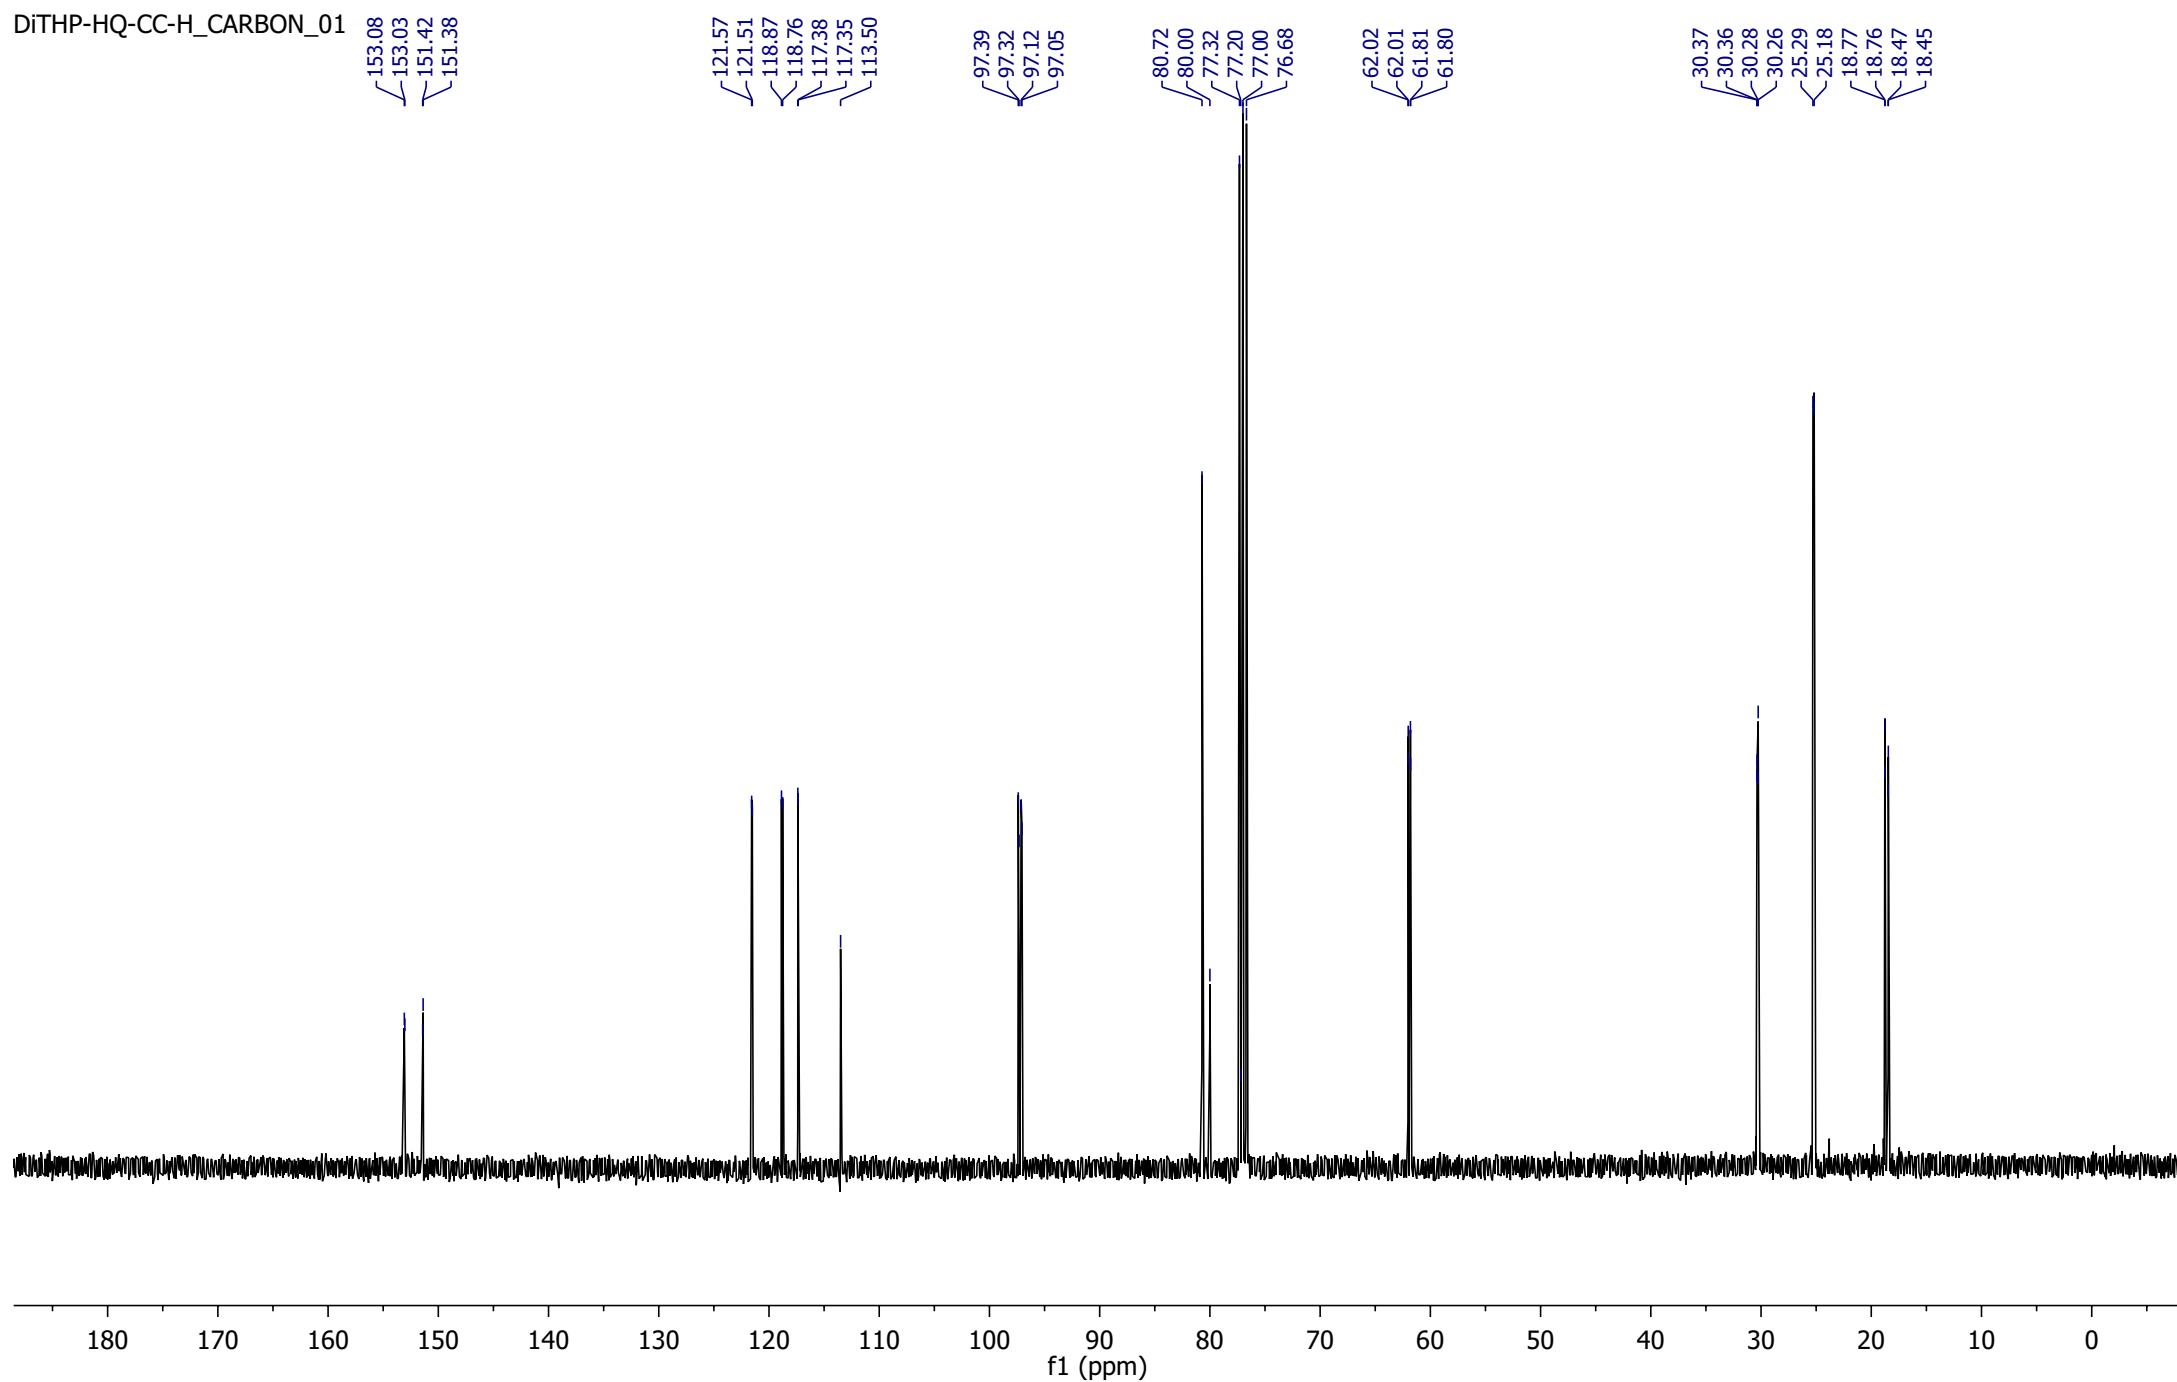

Figure S18.  $^{13}\text{C}$  NMR spectrum (100 MHz,  $\text{CDCl}_3$ ) of compound 5.

HQ-CC-Py-H\_CARBON\_01

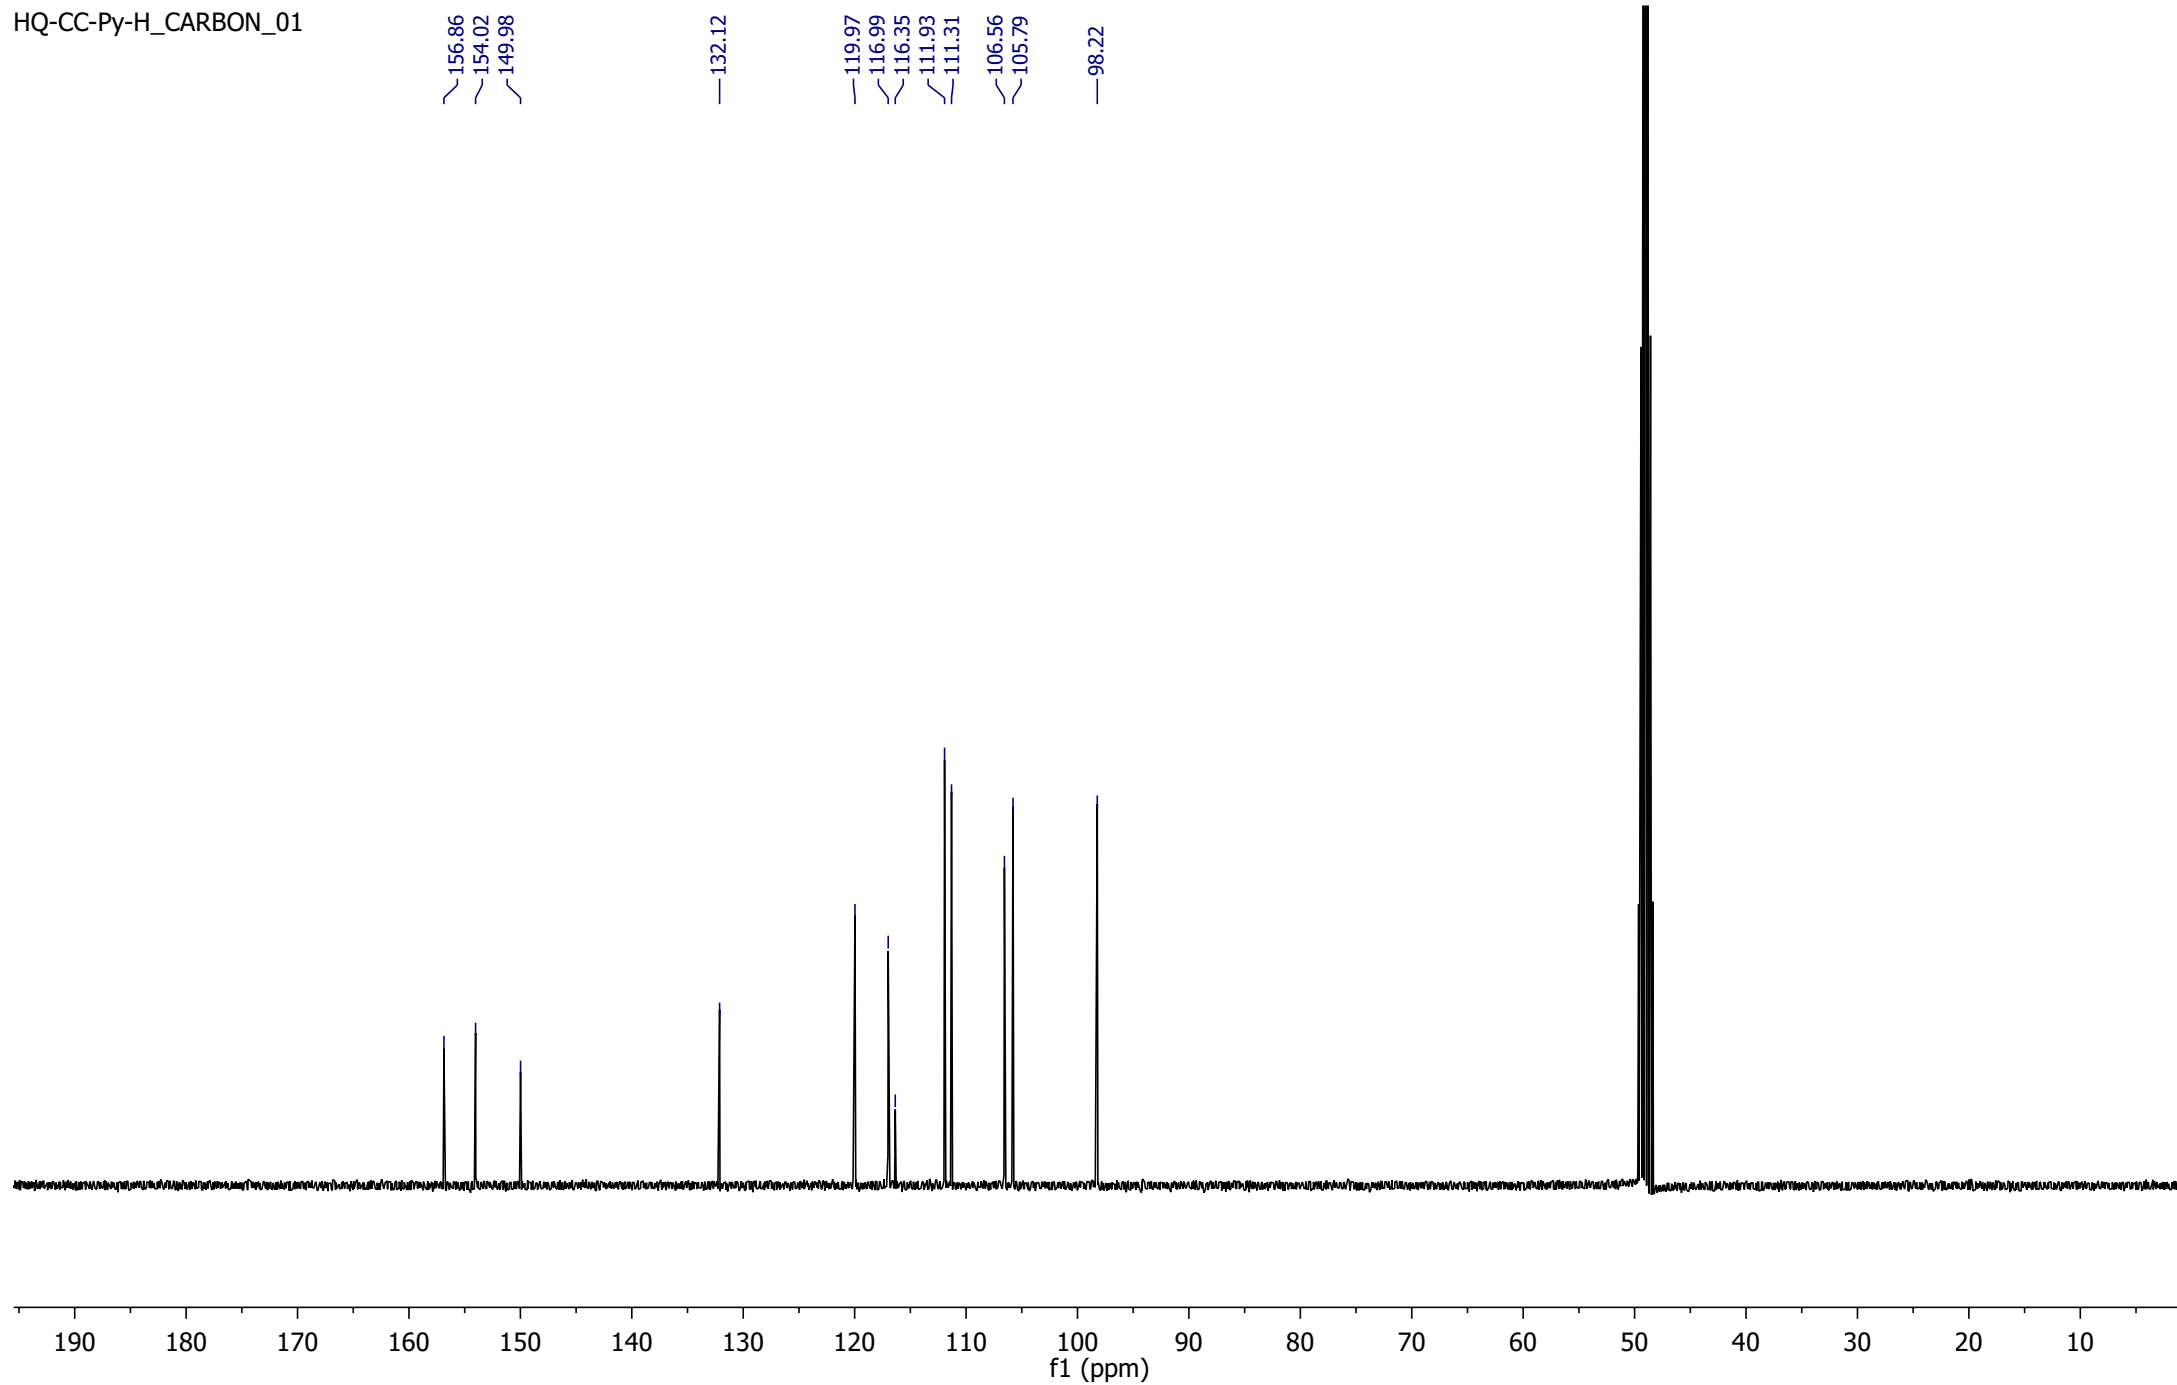

Figure S18. <sup>13</sup>C NMR spectrum (100 MHz, CD<sub>3</sub>OD) of compound 1.



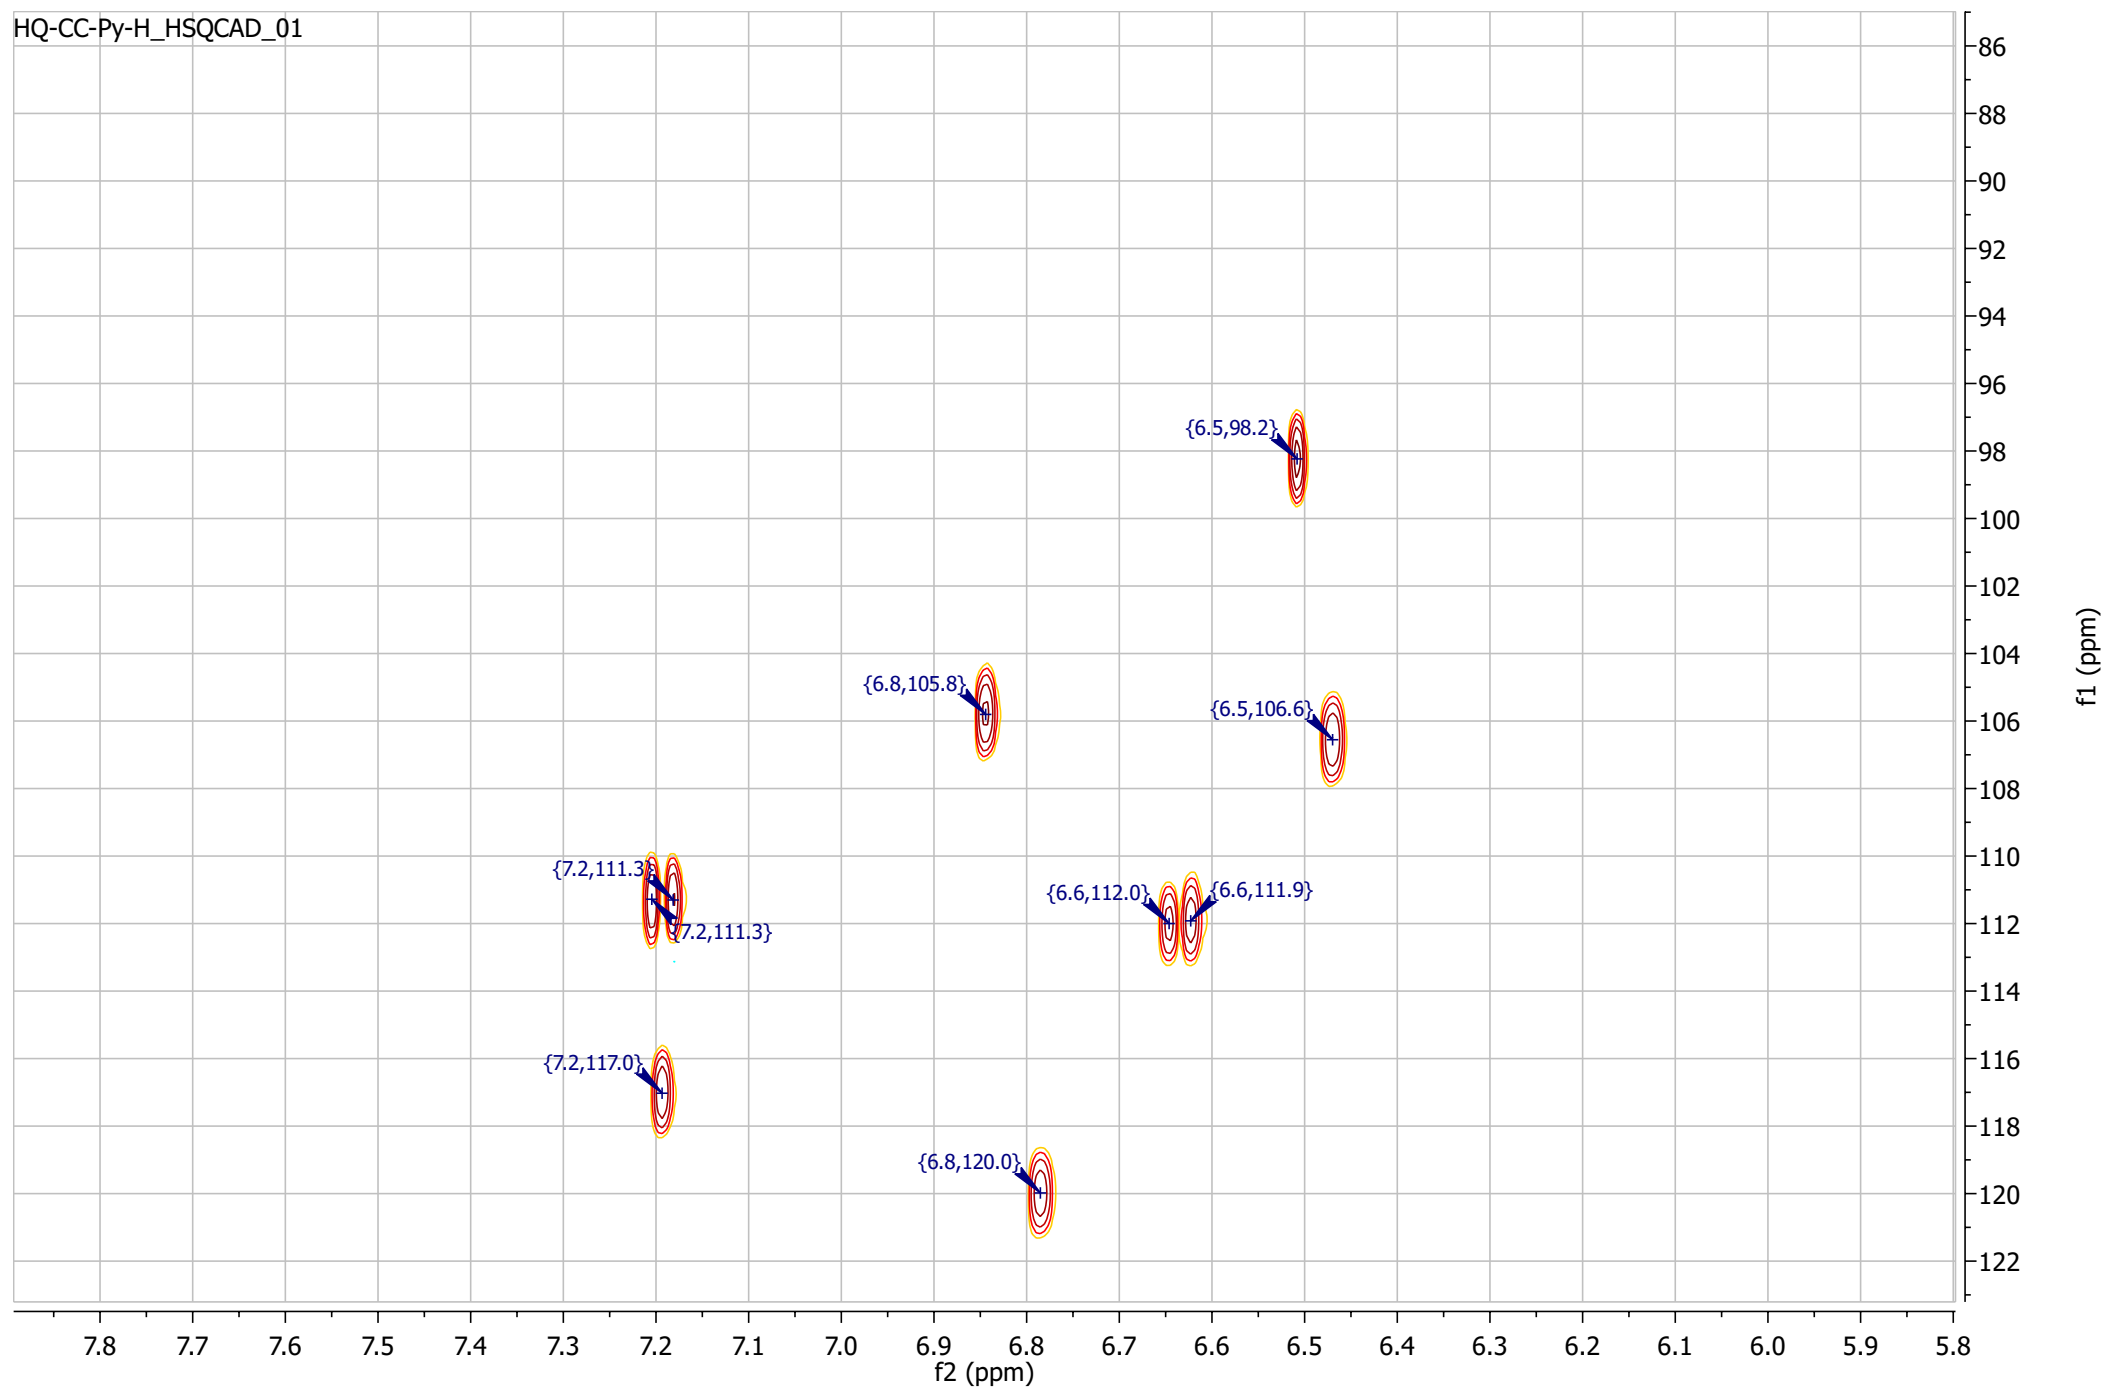Figure S19. HSQC NMR spectrum (400 MHz, CD<sub>3</sub>OD) of compound **1**.

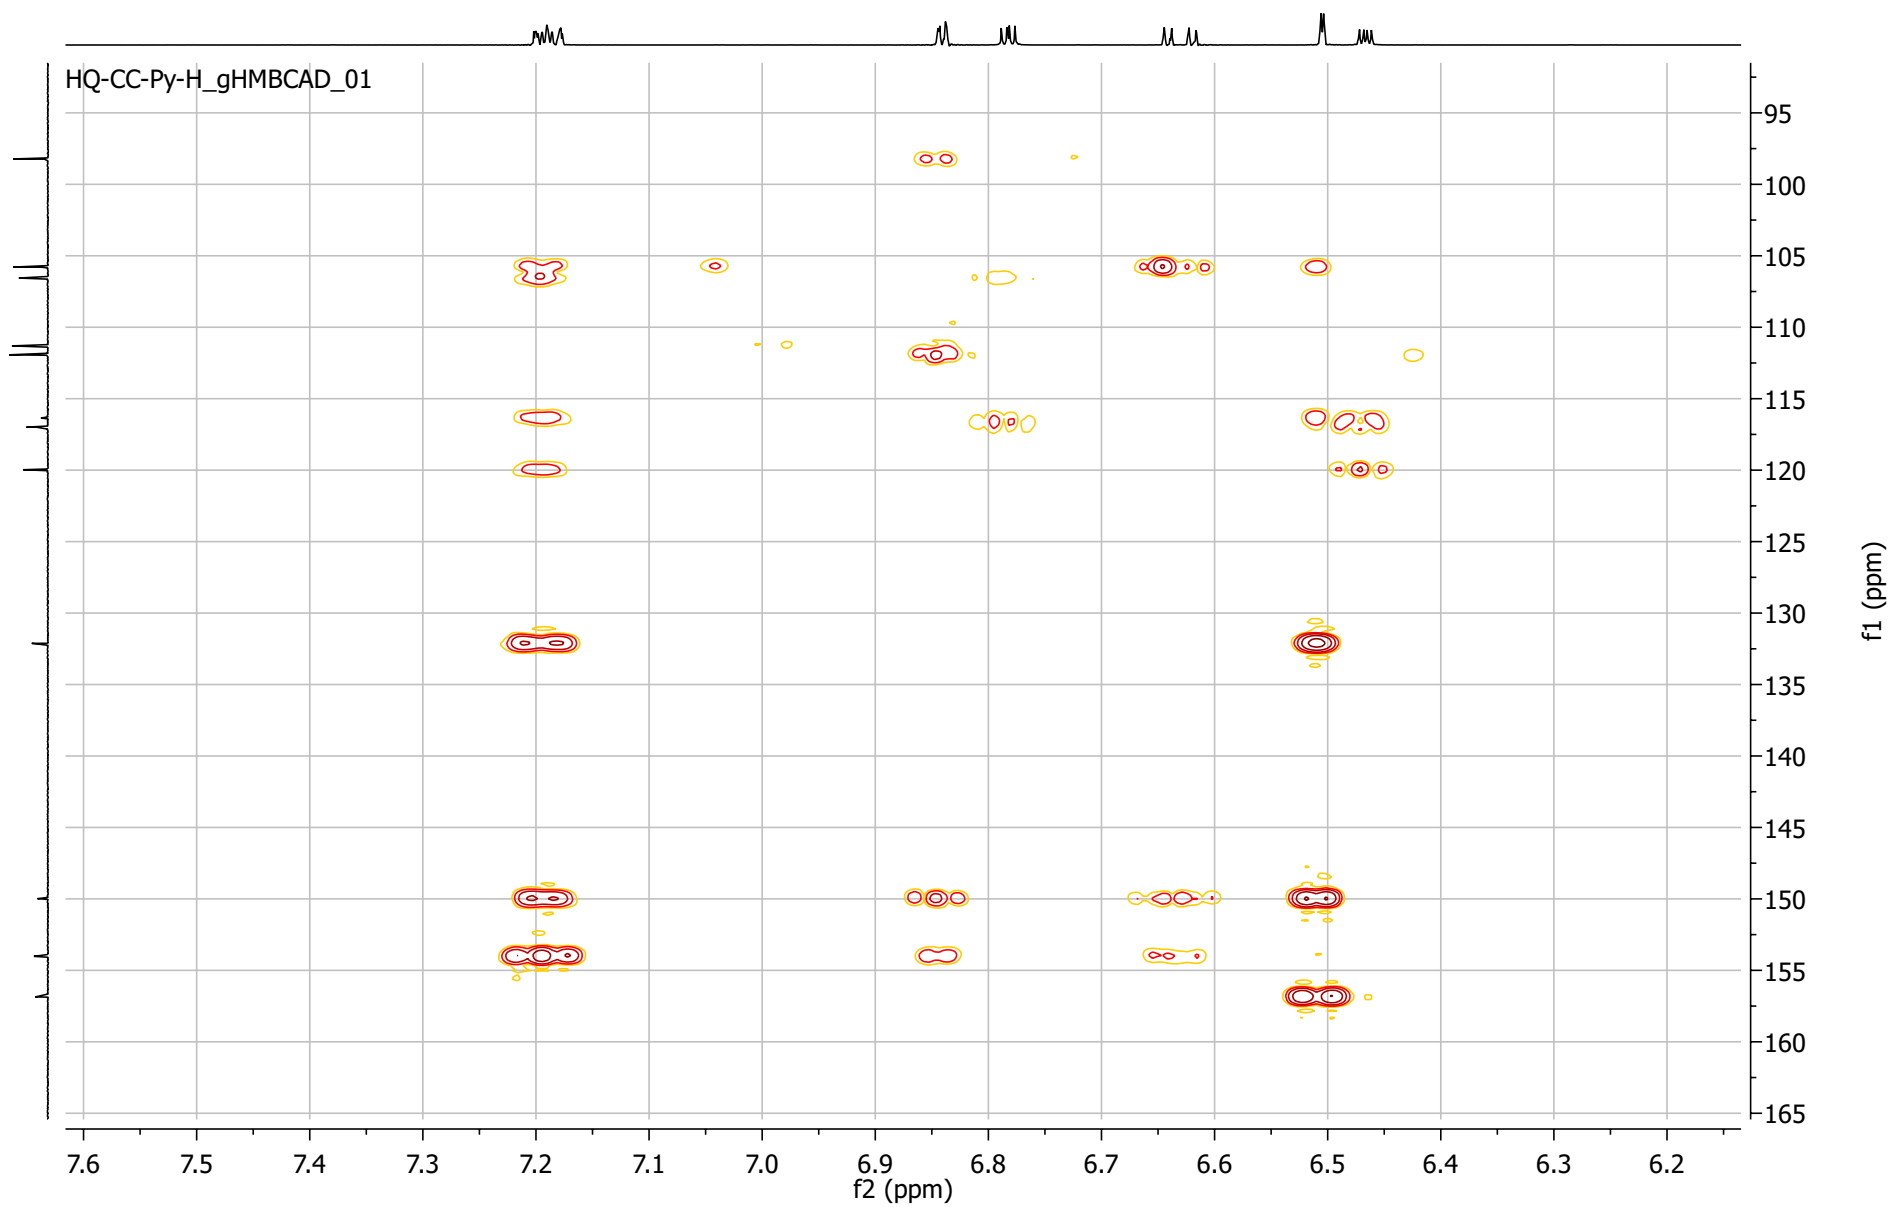

Figure S20. HMBC NMR spectrum (400 MHz, CD<sub>3</sub>OD) of compound 1.
